# Supplementary material
Source: PubMed Central journal article supplement (PMC2928607)
Supplement: 00015.2010_1.pdf [file 00015.2010_1.pdf]

Figure S1

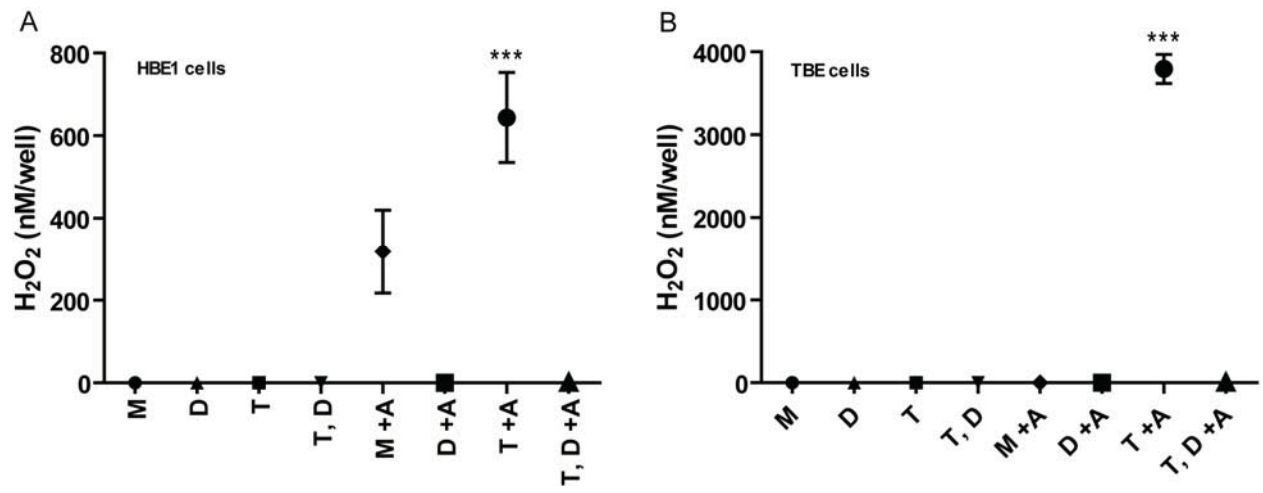

Figure S2

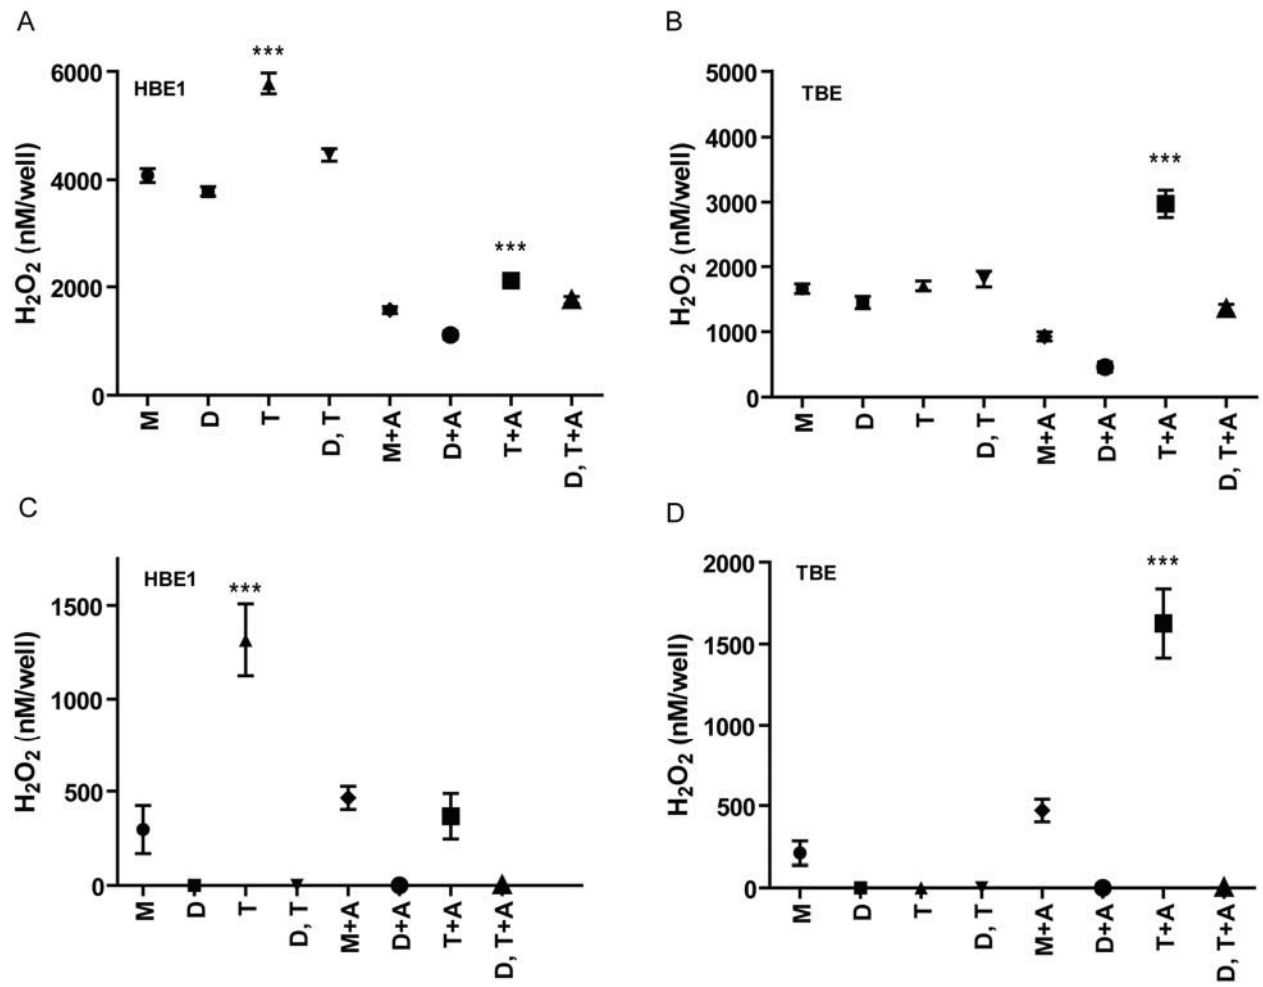

Figure S3

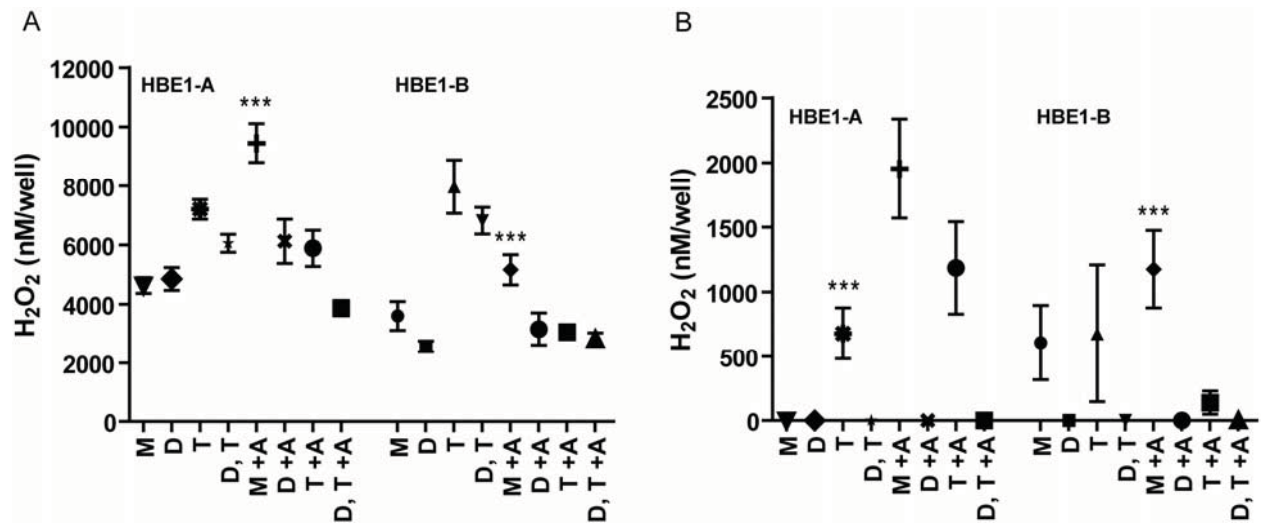

## LEGENDS TO SUPPLEMENTAL FIGURES

Figure S1. *Apical DPI-inhibitable H<sub>2</sub>O<sub>2</sub> production in HBE1 and TBE cells treated with or without ATRA.* A: HBE1 cells and B: primary TBE cells were grown in ALI culture conditions with or without 30nM ATRA for seven days followed by measurements of H<sub>2</sub>O<sub>2</sub> using Amplex Red assays; (M): media alone, (T): thapsigargin (1μM), (D) diphenyleneiodonium (20μM), (T,D): thapsigargin/ diphenyleneiodonium co-treatment. Values are expressed as nM H<sub>2</sub>O<sub>2</sub>/well/10 minutes by comparing to a H<sub>2</sub>O<sub>2</sub> standard curve. Data represent the mean and SEM of three independent experiments with nine wells per treatment group. \*\*\*P < 0.0001 (by ANOVA).

Figure S2. *Apical H<sub>2</sub>O<sub>2</sub> production in HBE1 and TBE cells treated with or without ATRA.* A: HBE1 cells and B: primary TBE cells were grown in ALI culture conditions with or without 30nM ATRA for seven days followed by measurements of H<sub>2</sub>O<sub>2</sub> using Amplex Red assays; (M): media alone, (T): thapsigargin (1μM), (D) diphenyleneiodonium (2μM), (T,D): thapsigargin/ diphenyleneiodonium co-treatment. C and D: Data from panels A and B minus DPI uninhibitable H<sub>2</sub>O<sub>2</sub>. Values are expressed as nM H<sub>2</sub>O<sub>2</sub>/well/10 minutes by comparing to a H<sub>2</sub>O<sub>2</sub> standard curve. Data represent the mean and SEM of three independent experiments with nine wells per treatment group. \*\*\*P < 0.0001 (by ANOVA).

Figure S3. *Apical H<sub>2</sub>O<sub>2</sub> production in HBE1 cells treated with or without ATRA.* A: Two separate vials of HBE1 cells were grown in ALI culture conditions with or without 30nM ATRA for seven days followed by measurements of H<sub>2</sub>O<sub>2</sub> using Amplex Red assays; (M): media alone, (T): thapsigargin (1μM), (D) diphenyleneiodonium (2μM), (T,D): thapsigargin/

diphenyleioidonium co-treatment. *B*: Data from panel A minus DPI un-inhibitable H<sub>2</sub>O<sub>2</sub>. Values are expressed as nM H<sub>2</sub>O<sub>2</sub>/well/10 minutes by comparing to a H<sub>2</sub>O<sub>2</sub> standard curve. Data represent the mean and SEM of three independent experiments with nine wells per treatment group. \*\*\*P < 0.0001 (by ANOVA).
